# Supplementary material
Source: Research Square preprint supplement (doi:10.21203/rs.3.rs-8787248/v1)
Supplement: Supplementary file 1 [file 9fb8c88a4b379f7be4425297.docx]

**Supplementary Fig. S1**

Biota detected by eDNA in the Paraná River sites during the study period by A) eDNA in biofilm and B) eDNA in water.

| **Supplementary Table S1: A list of taxa identified by each technique (Morpho, MolBio, and MolWat).** | | | | | |  |  |  |
| --- | --- | --- | --- | --- | --- | --- | --- | --- |
|  |  |  |  |  |  |  |  |  |
|  |  |  |  |  |  |  |  |  |
|  |  |  |  |  |  |  |  |  |
| Phylum | Class | Order/Superorder | Family | Genera | Species/Morphoespecies | Morpho | MolBio | MolWat |
| Cnidaria | Hydrozoa |  |  |  | Hydrozoa sp | x |  |  |
|  |  | Hydreyueduioida | Hydridae | *Hydra* | *Hydra vulgaris* |  |  | x |
| Nematoda |  |  |  |  | Nematoda spp | x |  |  |
| Plathyelmintes | Turbellaria |  |  |  | Turbellaria spp | x |  |  |
|  |  | Catenulida | Retronectidae | *Myoretronectes* | *Myorentronectes paranaensis* | x |  |  |
|  |  | Tricladida |  |  | Tricladida spp | x |  |  |
| Annelida | Aphanoneura |  | Aeolosomatidae | *Aeolosoma* | *Aeolosoma* sp |  | x |  |
|  |  |  |  |  | *Aeolosomatidae* sp |  | x |  |
|  | Clitellata | Tubificidae | Naididae | *Allonais* | *Allonais inaequalis* |  | x | x |
|  |  |  |  | *Homochaeta* | *Homochaeta lactea* | x |  |  |
|  |  |  |  | *Limnodrilus* | *Limnodrilus hoffmeisteri* | x |  |  |
|  |  |  |  | *Nais* | *Nais communis* | x |  |  |
|  |  |  |  |  | *Nais* sp |  | x |  |
|  |  |  |  |  | *Nais stolci* |  | x |  |
|  |  |  |  |  | *Nais variabilis* | x |  |  |
|  |  |  |  | *Paranadrilus* | *Paranadrilus descolei* | x |  |  |
|  |  |  |  | *Pristina* | *Pristina aequiseta* | x | x | x |
|  |  |  |  |  | *Pristina biserrata* | x |  |  |
|  |  |  |  |  | *Pristina jenkinae* | x |  |  |
|  |  |  |  |  | *Pristina leidyi* | x | x | x |
|  |  |  |  |  | *Pristina longiseta* |  | x |  |
|  |  |  |  |  | *Pristina macrochaeta* | x |  |  |
|  |  |  |  |  | *Pristina menoni* | x |  |  |
|  |  |  |  |  | *Pristina osborni* | x | x |  |
|  |  |  |  |  | *Pristina proboscidea* | x |  |  |
|  |  |  |  |  | *Pristina* sp. |  | x |  |
|  |  |  |  |  | *Pristina synclites* | x |  |  |
|  |  |  |  | *Slavina* | *Slavina evelinae* | x | x |  |
|  |  |  |  |  | *Slavina isochaeta* | x |  |  |
|  |  |  |  |  | *Slavina sawayai* | x |  |  |
|  |  |  |  |  | *Slavina* sp | x |  |  |
|  |  |  |  | *Stephensoniana* | *Stephensoniana trivandana* | x |  |  |
|  |  |  |  | *Stylaria* | *Stylaria fossularis* | x |  |  |
|  |  |  |  | *Tubifex* | *Tubifex banchardi* | x |  |  |
|  |  |  |  | *Allonais* | *Allonais paraguayensis* | x |  |  |
|  |  |  |  |  | *Allonais pectinata* |  | x |  |
|  |  |  |  | *Amphichaeta* | *Amphichaeta* sp |  | x | x |
|  |  |  |  | *Aulodrilus* | *Aulodrilus pigueti* | x | x |  |
|  |  |  |  | *Aulophorus* | *Aulophorus borellii* | x |  |  |
|  |  |  |  |  | *Aulophorus furcata* | x |  |  |
|  |  |  |  |  | *Aulophorus gravelyi* | x |  |  |
|  |  |  |  | *Bothrioneurum* | *Bothrioneurum* sp | x |  |  |
|  |  |  |  | *Bratislavia* | *Bratislavia unidentata* | x |  |  |
|  |  |  |  | *Chaetogaster* | *Chaetogaster diaphanus* | x |  |  |
|  |  |  |  |  | *Chaetogaster* sp | x |  |  |
|  |  |  |  | *Dero* | *Dero digitata* | x | x |  |
|  |  |  |  |  | *Dero nivea* | x |  |  |
|  |  |  |  |  | *Dero obtusa* |  | x |  |
|  |  |  |  |  | *Dero sawayai* | x |  |  |
|  |  |  |  |  | *Dero* sp | x | x |  |
|  |  |  | Opistocystidae | *Trieminentia* | *Trieminentia corderoi* | x |  |  |
|  |  | Rhynchobdellida | Glossiphoniidae | *Helobdella* | *Helobdella addiastolla* | x |  |  |
|  | Polychaeta | Sabellida | Sabellidae | *Laonome* | *Laonome xeprovala* | x |  |  |
| Arthropoda | Arachnida | Araneae |  |  | Araneae spp | x |  |  |
|  |  | Trombidiformes | Hydrachnidia |  | Hydrachnidia sp | x |  |  |
|  |  |  |  |  | Acari sp | x |  |  |
|  |  |  |  |  | Acari sp1 | x |  |  |
|  | Ostracoda |  |  |  | Ostracoda spp | x |  |  |
|  |  |  |  | *Candona sp.* | *Candona* sp |  | x |  |
|  |  |  | Cyprididae sp |  | Cyprididae sp |  | x |  |
|  |  |  |  | *Cypridopsis* | *Cypridopsis* sp |  | x |  |
|  |  |  |  |  | *Cypridopsis vidua* |  | x |  |
|  |  |  |  | *Stenocypris* | *Stenocypris hislopi* |  | x |  |
|  |  |  |  |  | Podocopida sp. |  |  | x |
|  | Copepoda | Harpacticoida |  |  | Harpacticoida spp | x |  |  |
|  | Malacostraca | Amphipoda | Hyalellidae | *Hyalella* | *Hyalella curvispina* | x | x |  |
|  |  | Decapoda | Palaemonidae | *Palaemonetes* | *Palaemonetes argentinus* | x |  |  |
|  |  |  | Trychodactylidae | *Trichodactylus* | *Trichodactylus borellianus* | x | x |  |
|  | Ichthyostraca | Arguloida | Argulidae |  | Argulidae sp | x |  |  |
|  | Insecta | Odonata |  |  | Anisoptera sp | x |  |  |
|  |  |  | Coenagrionidae |  | Coenagrionidae spp | x |  |  |
|  |  |  | Gomphidae |  | Gomphidae sp | x |  |  |
|  |  |  | Libellulidae |  | Libellulidae sp | x |  |  |
|  |  |  |  |  | Zygoptera sp | x |  |  |
|  |  |  | Aeshnidae |  | Aeshnidae sp | x |  |  |
|  |  | Trichoptera | Polycentropodidae | *Cernotina* | *Cernotina* sp | x |  |  |
|  |  |  |  | *Cyrnella* | *Cyrnella sp* | x |  |  |
|  |  |  |  | *Cyrnellus* | *Cyrnellus sp* | x |  |  |
|  |  |  | Hydroptilidae |  | Hydroptilidae spp | x |  |  |
|  |  |  |  | *Neotrichia* | *Neotrichia* sp | x |  |  |
|  |  |  | Polycentropodidae |  | Polycentropodidae spp | x |  |  |
|  |  |  |  | *Polycentropus* | *Polycentropus* sp | x |  |  |
|  |  | Ephemeroptera | Baetidae |  | Baetidae sp | x |  |  |
|  |  |  |  | *Limnobaetodes* | *Limnobaetodes* sp | x |  |  |
|  |  |  |  | *Callibaetis* | *Callibaetis ferrugineus* |  |  |  |
|  |  |  |  | *Callibaetis* | *Callibaetis pretiosus* |  |  |  |
|  |  |  | Caenidae | *Caenis* | *Caenis plugfelderi* | x |  |  |
|  |  |  |  | *Caenis* | Caenis spp | x |  |  |
|  |  |  | Polymitarcidae | *Campsurus* | *Campsurus violaceus* | x |  |  |
|  |  | Collembola | Entomobryidae |  | Entomobryidae spp | x |  |  |
|  |  |  |  |  | Entomobryoidea spp | x |  |  |
|  |  |  | Isotomidae |  | Isotomidae spp | x |  |  |
|  |  |  | Sminthuridae |  | Sminthuridae spp | x |  |  |
|  |  | Diptera | Chironomidae | *Ablabesmyia* | *Ablabesmyia* (Karelia) sp | x (P , B) |  |  |
|  |  |  |  |  | *Ablabesmyia gr. annulata* | x (P , B) |  |  |
|  |  |  |  | *Aedokritus* | *Aedokritus* sp | x |  |  |
|  |  |  |  | *Caladomyia* | *Caladomyia aff ortoni* | x |  |  |
|  |  |  |  |  | *Caladomyia* sp | x |  |  |
|  |  |  |  |  | Chironomidae sp | x | x | x |
|  |  |  |  | *Chironomus* | Chironomus sp 1 | x | x |  |
|  |  |  |  |  | Chironomus sp 2 | x |  |  |
|  |  |  |  | *Cladopelma* | *Cladopelma forcipis* |  | x |  |
|  |  |  |  |  | *Cladopelma virescens* |  | x |  |
|  |  |  |  | *Coelotanypus* | Coelotanypus sp | x |  |  |
|  |  |  |  | *Corynoneura* | *Corynoneura* sp | x |  |  |
|  |  |  |  | *Cryptochironomus* | *Cryptochironomus prox reshikov* | x |  |  |
|  |  |  |  |  | *Cryptochironomus* sp | x |  |  |
|  |  |  |  | *Denopelopia* | *Denopelopia sp* | x |  |  |
|  |  |  |  | *Dicrotendipes* | *Dicrotendipes prox sp3* | x |  |  |
|  |  |  |  |  | *Dicrotendipes sp.* |  | x |  |
|  |  |  |  | *Djalmabatista* | *Djalmabatista sp* | x |  |  |
|  |  |  |  | *Endotribelos* | *Endotribelos prox hespe* | x |  |  |
|  |  |  |  | *Fissimentum* | *Fissimentum prox dessicatum* | x |  |  |
|  |  |  |  |  | *Fissimentum* prox sp3 | x |  |  |
|  |  |  |  |  | *Fissimentum* sp | x |  |  |
|  |  |  |  | *Goeldichironomus* | *Goeldichironomus luridus* | x |  |  |
|  |  |  |  |  | *Goeldichironomus* sp | x |  |  |
|  |  |  |  | *Labrundinia* | *Labrundinia* sp | x | x | x |
|  |  |  |  | *Larsia* | Larsia sp | x |  |  |
|  |  |  |  | *Monopelopia* | *Monopelopia* sp | x |  |  |
|  |  |  |  | Orthocladiinae | Orthocladiinae sp | x |  |  |
|  |  |  |  | *Polypedilum* | *Polypedilum* (P) spp | x |  |  |
|  |  |  |  | *Polypedilum* | *Polypedilum* (T) sp 1 | x |  |  |
|  |  |  |  | *Polypedilum* | *Polypedilum* (T) sp 2 | x |  |  |
|  |  |  |  | *Polypedilum* | *Polypedilum albicorne* |  | x |  |
|  |  |  |  | *Polypedilum* | *Polypedilum albiventirs* |  | x |  |
|  |  |  |  | *Polypedilum* | *Polypedilum convexum* |  | x |  |
|  |  |  |  | *Polypedilum* | *Polypedilum unifascium* |  | x | x |
|  |  |  |  | *Paratanytarsus* | *Paratanytarsus* sp | x | x |  |
|  |  |  |  | *Parachironomus* | *Parachironomus* sp | x |  |  |
|  |  |  |  | *Parakieferella* | *Parakieferella* sp | x |  |  |
|  |  |  |  | *Paralauterborniella* | *Paralauterborniella* sp | x |  |  |
|  |  |  |  | *Tanypus* | *Tanypus* sp | x |  |  |
|  |  |  |  | *Tanytarsus* | *Tanytarsus hastatus* |  | x |  |
|  |  |  |  | *Tanytarsus* | *Tanytarsus inaequalis* | x | x |  |
|  |  |  |  | *Tanytarsus* | *Tanytarsus jacaretingensis* |  | x | x |
|  |  |  |  | *Tanytarsus* | *Tanytarsus kiche* |  | x |  |
|  |  |  |  | *Tanytarsus* | *Tanytarsus obiriciae* | x | x |  |
|  |  |  |  | *Tanytarsus* | Tanytarsus sp 1 | x |  |  |
|  |  |  |  | *Tanytarsus* | Tanytarsus sp. |  | x |  |
|  |  |  |  | *Tanytarsus* | Tanytarsus sp2 | x |  |  |
|  |  |  |  | *Saetheria* | *Saetheria* sp | x |  |  |
|  |  |  | Ceratopogonidae | *Bezzia* | *Bezzia* sp | x |  |  |
|  |  |  | Tabanidae | *Chrysops* | *Chrysops* sp | x |  |  |
|  |  |  | Culicidae | *Culex* | *Culex chidesteri* |  | x |  |
|  |  |  |  |  | Culicidae sp | x |  |  |
|  |  |  |  | *Dashyhelea* | *Dashyhelea sp* | x |  |  |
|  |  |  | Stratyiomidae |  | Stratyiomidae sp | x |  |  |
|  |  |  | Muscidae |  | Muscidae sp | x |  |  |
|  |  |  | Psychodidae |  | Psychodidae sp |  | x |  |
|  |  |  | Syrphidae |  | Syrphidae sp | x |  |  |
|  |  |  |  |  | Diptera sp | x |  |  |
|  |  | Thysanoptera |  |  | Thysanoptera spp | x |  |  |
|  |  | Coleoptera | Hydrophilidae | *Anacaena* | *Anacaena* sp | x |  |  |
|  |  |  |  | *Berosus* | *Berosus* sp | x |  |  |
|  |  |  |  |  | Hydrophilidae sp | x |  |  |
|  |  |  |  |  | Hydrophilidae sp | x |  |  |
|  |  |  |  |  | Hydrophilus sp | x |  |  |
|  |  |  | Hydrophilidae | *Hydramara* | *Hydramara argentina* | x |  |  |
|  |  |  | Dytiscidae | *Copelatus* | *Copelatus* sp | x |  |  |
|  |  |  |  |  | Dytiscidae sp | x |  |  |
|  |  |  |  | *Laccophylus* | *Laccophylus* sp | x |  |  |
|  |  |  | Curculionidae |  | Curculionidae sp | x |  |  |
|  |  |  |  | *Neochetina* | *Neochetina* sp | x | x |  |
|  |  |  | Elmidae |  | Elmidae sp | x |  |  |
|  |  |  | Noteridae | *Hydrocanthus* | *Hydrocanthus* sp | x |  |  |
|  |  |  |  | *Notomicrus* | *Notomicrus* sp | x | x |  |
|  |  |  | Scirtidae |  | Scirtidae sp | x |  |  |
|  |  | Hemiptera |  |  | Hemiptera sp | x |  |  |
|  |  |  | Belostomatidae | *Belostoma* | *Belostoma* sp | x |  |  |
|  |  |  | Hebridae | *Lipogomphus* | *Lipogomphus* sp | x |  |  |
|  |  |  | Noteridae | *Mesonoterus* | *Mesonoterus* sp | x |  |  |
|  |  |  | Microveliidae | *Microvelia* | *Microvelia* sp | x |  |  |
|  |  |  | Helotrephidae | *Neotrephes* | *Neothrephes* sp | x |  |  |
|  |  |  | Corixidae | *Sigara* | *Sigara* sp | x |  |  |
|  |  |  | Micronectidae | *Tenagobia* | Tenagobia sp | x |  |  |
|  |  |  | Veliidae |  | Veliidae sp | x |  |  |
|  |  | Homoptera |  |  | Homoptera spp | x |  |  |
|  |  | Lepidoptera | Crambidae |  | Crambinae sp | x |  |  |
|  |  |  |  | *Parapoynx* | *Parapoynx* sp | x |  |  |
|  |  |  |  | *Synclita* | *Synclita* sp | x |  |  |
| Mollusca | Bivalvia | Mytiloida | Mytilidae | *Limnoperna* | *Limnoperna fortunei* | x |  |  |
|  |  | Veneroida | Sphaeriiidae | *Pisidium* | *Pisidium* spp | x |  |  |
|  |  |  |  |  | Sphaeriidae spp | x |  |  |
|  |  |  | Corbiculidae | *Corbicula* | *Corbicula fluminea* | x |  |  |
|  | Gastropoda | Hygrophila | Planorbidae |  | Planorbidae sp | x |  |  |
|  |  |  |  |  | Ancylinae spp | x |  |  |
|  |  |  |  | *Anysancilus* | *Anysancilus* sp | x |  |  |
|  |  |  |  | *Biomphalaria* | *Biomphalaria* spp | x |  |  |
|  |  |  |  | *Drepanotrema* | Drepanotrema sp | x |  |  |
|  | Gastropoda | Mesogatropoda | Ampullariidae |  | Ampullariidae spp | x |  |  |
|  |  |  |  | *Asolene* | *Asolene platae* | x |  |  |
|  |  |  |  |  | Asolene spixi | x |  |  |
|  |  |  |  | *Pomacea* | *Pomacea canaliculata* | x |  |  |
|  |  | Stylomatophora | Succineidae | *Omalonyx* | *Omalonyx unguis* | x |  | x |
|  |  |  |  |  | Succineidae sp | x |  |  |
|  |  | Truncatelloida | Cochliopidae | *Heleobia* | *Heleobia charruana* |  | x |  |
|  |  |  |  |  | *Heleobia guaranitica* | x |  |  |
|  |  |  |  |  | *Heleobia occidentalis* |  | x | x |
|  |  |  |  |  | *Heleobia parchapii* | x |  |  |
|  |  |  |  |  | *Heleobia piscium* |  | x | x |
|  |  |  |  |  | *Heleobia* sp | x |  |  |

**Supplementary Fig. S2****-**Absolute abundance of AVSs detected by the different techniques in the Paraná River basin during the study period
